# Supplementary material for: Cumulative effects of climate and landscape change drive spatial distribution of Rocky Mountain wolverine (Gulo gulo L.)
Source: PubMed Central journal article supplement (PMC5677488; doi:10.1002/ece3.3337), 2017-09-21

**Appendix S1** – Maps survey locations with wolverine detections (black points) and non-detections (grey points) across study area, with few detections occurring outside of the National Parks Complex.

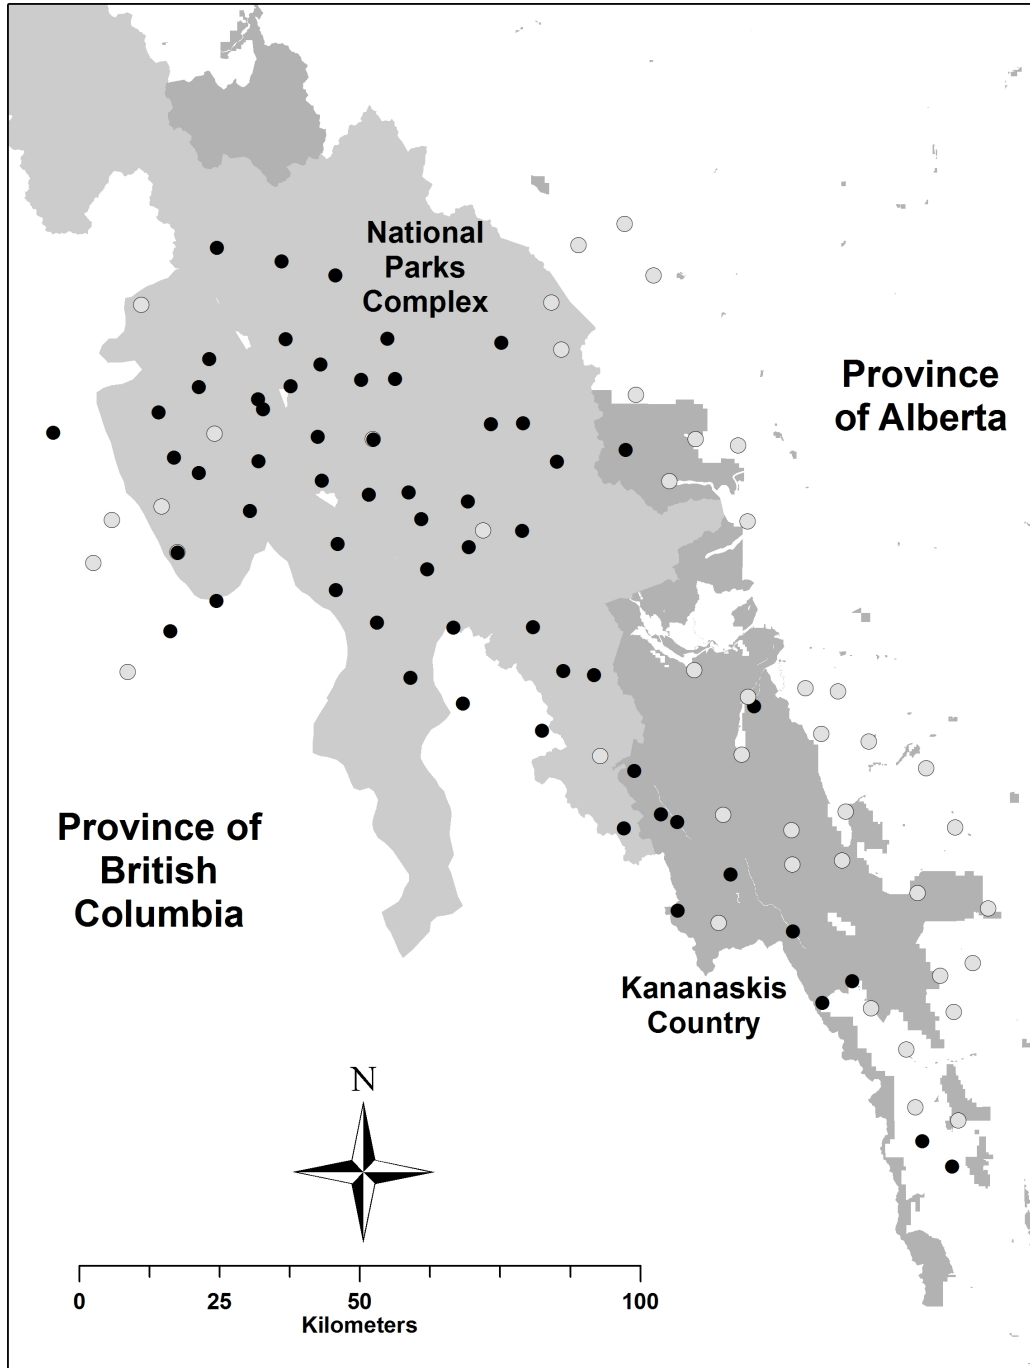

Supplement: ECE3-7-8903-s001.pdf [file ECE3-7-8903-s001.pdf]
